# Supplementary material
Source: PubMed Central journal article supplement (PMC4424389)
Supplement: bmt2014326x1.pdf [file bmt2014326x1.pdf]

## Supplemental Table 1: NHLBI Transplant Protocols

| Protocol  | n  | Stem Cell Source | Conditioning Intensity                                                 | Total Fludarabine mg/m <sup>2</sup> | Total Cytosoxan m/kg | Other conditioning                                                    | TBI cGy                  | TBI (lung) | Unselected T cell addback                                               | Pre-DLI GVHD Prophylaxis                                                                                              |
|-----------|----|------------------|------------------------------------------------------------------------|-------------------------------------|----------------------|-----------------------------------------------------------------------|--------------------------|------------|-------------------------------------------------------------------------|-----------------------------------------------------------------------------------------------------------------------|
| 93-H-0212 | 1  | Marrow           | Fully ablative                                                         | 0                                   | 120                  | none                                                                  | 1360                     | 1360       | d30:2 x10e <sup>6</sup> /kg; d45: 5x10e <sup>7</sup> /kg                | Standard dose CSA (200-400) day -4 to day +180                                                                        |
| 94-H-0092 | 3  | Marrow           | Fully ablative                                                         | 0                                   | 120                  | none                                                                  | 1360                     | 1360       | d30:2 x10e <sup>6</sup> /kg; d45: 5x10e <sup>7</sup> /kg                | Standard dose CSA (200-400) day -4 to day +180                                                                        |
| 97-H-0099 | 9  | PBSC             | Fully ablative                                                         | 0                                   | 120                  | none                                                                  | 1360                     | 1360       | d45:1 x10e <sup>7</sup> /kg; d100 (not for CML): 5x10e <sup>7</sup> /kg | Standard dose CSA (200-400) day -4 to day +180                                                                        |
| 99-H-0046 | 11 | PBSC             | Fully ablative                                                         | 0                                   | 120                  | none                                                                  | 1360                     | 1360       | d45:1 x10e <sup>7</sup> /kg; d100 (not for CML): 5x10e <sup>7</sup> /kg | Low dose CSA (100-200) day -4 to day +120 in the first 20 patients , no CSA in last 20 patients                       |
| 01-H-0162 | 3  | PBSC             | Non-myeloablative                                                      | 125                                 | /                    | variable                                                              | 0                        | 0          |                                                                         | Standard dose CSA (200-400) day -4 to >day +30                                                                        |
| 02-H-0111 | 6  | PBSC             | Fully ablative                                                         | 125                                 | 120                  | none                                                                  | 1200                     | 900        | d45:1 x10e <sup>7</sup> /kg; d100: 2x10e <sup>7</sup> /kg               | No CSA initially, Cyclosporine 6 mg/kg/day by mouth, dose adjusted to achieve levels 100-200 ng/ml day 44 to day +120 |
| 03-H-0192 | 1  | PBSC             | Fully ablative                                                         | 125                                 | 120                  | 25 Gy irradiated donor lymphocytes 2 x 10e8/kg day -4                 | 1200                     | 600        | day 45, 1x 10e7/kg                                                      | No CSA initially, Cyclosporine 6 mg/kg/day by mouth, dose adjusted to achieve levels 100-200 ng/ml day 44 to day +120 |
| 04-H-0112 | 17 | PBSC             | Fully ablative                                                         | 125                                 | 120                  | VP16 (60 mg/kg) for high risk-AML w blast >10%, ALL in CR2 or higher. | 1200                     | 600        | day 60, 1x 10e7/kg                                                      | Low dose CSA (100-200) day -6 to day +21                                                                              |
| 06-H-0248 | 17 | PBSC             | Fully ablative for age <55 (n=13), Reduced Intensity for Age >55 (n=4) | 125                                 | 120                  | none                                                                  | 1200 for Age <55, 600>55 | 600        | d90, 5 x 10e6/kg                                                        | Low dose CSA (100-200) day -6 to day +21                                                                              |
| 12-H-0028 | 4  | PBSC             | Fully ablative for age <55 (n=4), Reduced Intensity for Age >55 (n=0)  | 125                                 | 120                  | none                                                                  | 1200 for Age <55, 600>55 | 600        | none scheduled                                                          | Low dose CSA (100-200) day -6 to day +21                                                                              |

N.B: Second column (“n”) lists number of patients for whom pre-SCT samples could be identified. In addition to above, two protocols enrolled a single patient – 94-H-0010 (syngeneic from twin) and 98-H-0122 (haplo-identical). Clinical outcomes from these transplants were consistent with the pattern described in the text.

## Supplemental Table 2: Additional Patient Characteristics

### Non-relapse mortality (n=22)

- Median age/sex: 39 years, 64% Female
- In patients with CR at allo-SCT: 15/48 (31%)
- If active disease at allo-SCT: 7/26 (27%)

### Relapse within 1yr after allo-SCT (n=24)

- Median age/sex: 41 Years, 50% Female
- In patients with CR at allo-SCT: 9/48 (19%)
- If active disease at allo-SCT: 15/26 (58%)

### Relapse within 2yr after allo-SCT (n=26)

- Median age/sex: 40 years, 50% Female
- In patients with CR at allo-SCT: 10/48 (21%)
- If active disease at allo-SCT: 16/26 (62%)

### Relapse after allo-SCT (n=28)

- Median age/sex: 40 years, 54% Female
- In patients with CR at allo-SCT: 11/48 (23%)
- If active disease at allo-SCT: 17/26 (65%)

### Patients alive after allo-SCT (n=25)

- Median age/sex: 44 years, 48% Female
- In patients with CR at allo-SCT: 22/48 (46%)
- If active disease at allo-SCT: 3/26 (12%)

**Supplemental Table 3: Gene targets used in multigene MRD assay.**

| <b>Symbol</b> | <b>Description</b>                             | <b>Unigene No</b> | <b>Refseq No</b> | <b>Band Size (bp)</b> | <b>Reference Position</b> |
|---------------|------------------------------------------------|-------------------|------------------|-----------------------|---------------------------|
| WT1           | Wilms tumor 1                                  | Hs.591980         | NM_000378        | 162                   | 674                       |
| PRAME         | Preferentially expressed antigen in melanoma   | Hs.30743          | NM_006115        | 135                   | 1290                      |
| PRTN3         | Proteinase 3                                   | Hs.928            | NM_002777        | 82                    | 653                       |
| CCNA1         | Cyclin A1                                      | Hs.417050         | NM_003914        | 120                   | 1571                      |
| MSLN          | Mesothelin                                     | Hs.408488         | NM_005823        | 119                   | 1276                      |
| ABL1          | C-abl oncogene 1, non-receptor tyrosine kinase | Hs.431048         | NM_005157        | 81                    | 5253                      |

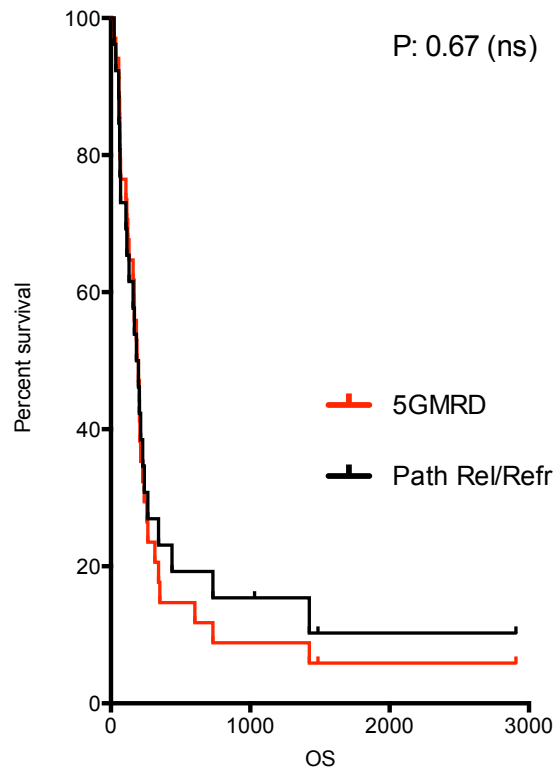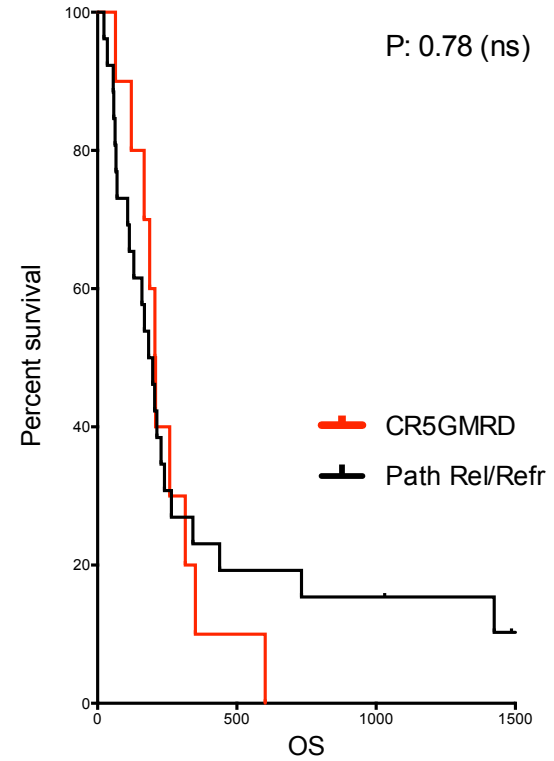

**Supplemental Figure 1:** Post transplantation survival statistically indistinguishable between 5GMRD patients and those with pathologist clinical diagnosis of relapsed/refractory active disease (Path Rel/Refr). Both all patients with 5G-MRD positive test from peripheral blood (5GMRD, left graph) and the subset who were 5G-MRD positive and also were judged to be in a pathological complete remission (CR5GMRD, right graph) had survival not different from those with active disease. Curve comparison by log-rank Mantel-Cox test.

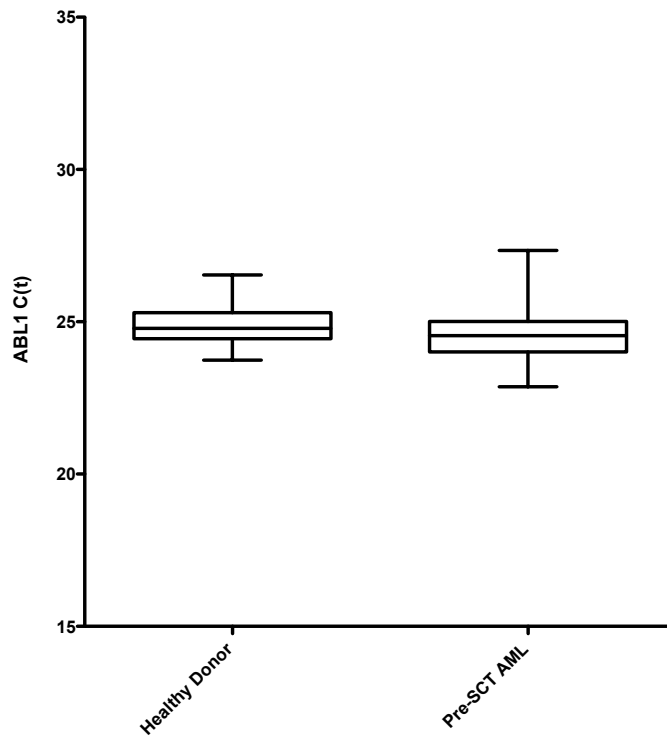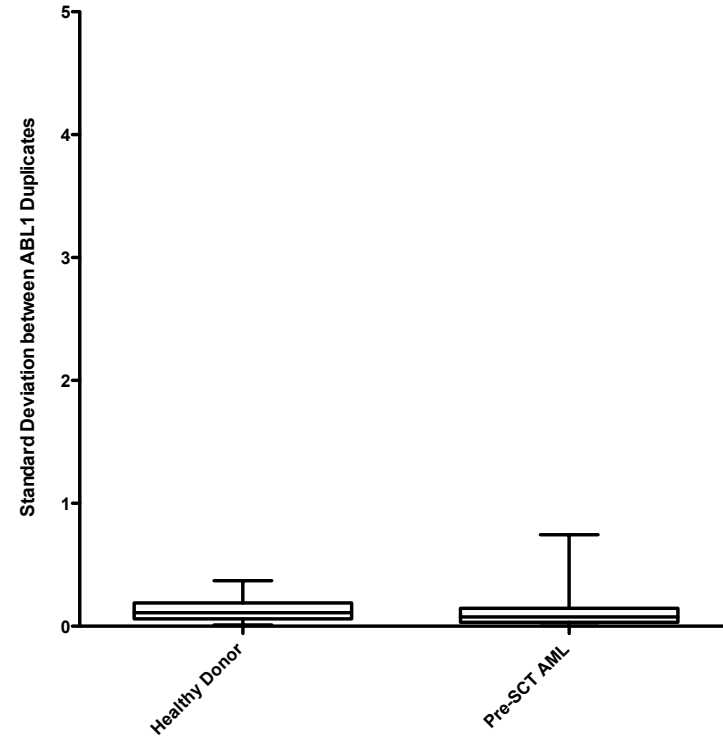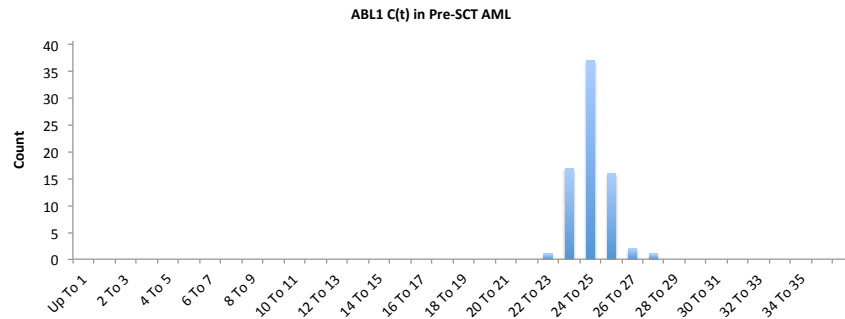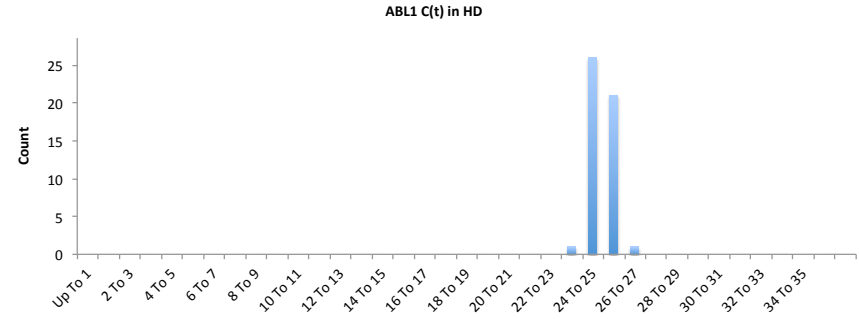

**Supplemental Figure 2:** Multigene AML MRD quantitative RT-PCR array is highly reproducible. Upper Left: One ug of total RNA was used for each sample timepoint, box plots whiskers represent minimum and maximum *ABL1* C(t) observed. Upper Right: Standard deviation of technical replicates of *ABL1* (performed in duplicate on each sample). Lower: Distribution of *ABL1* C(t) values in pre-SCT AML patients (bottom left) and healthy donors (bottom right)

A)

**Receiver operating characteristic (ROC) Curves: WT1 (Blue) vs 4G MRD (Red)**

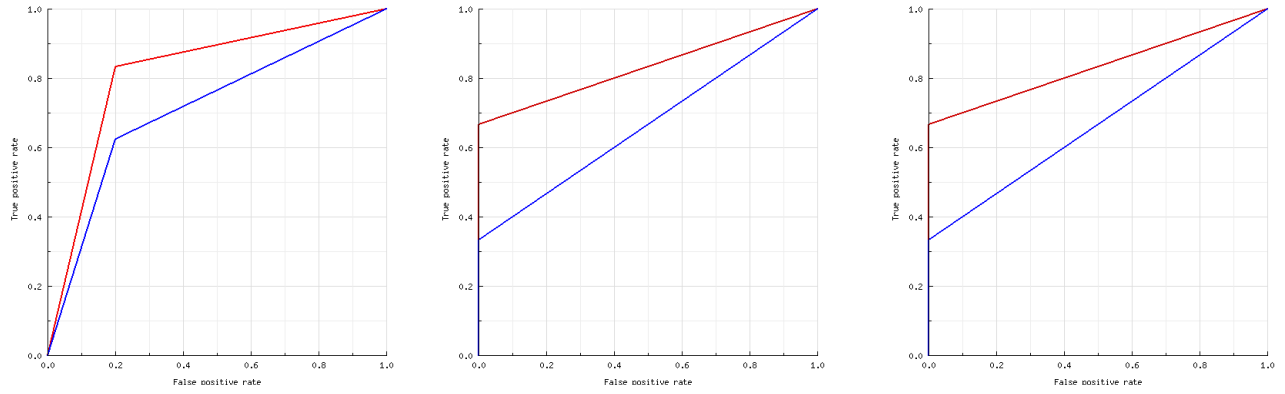

|                | 74 pts (all)       | 48 pts (all CR)    | 37 pts (CR exclude NRM) |
|----------------|--------------------|--------------------|-------------------------|
| WT1 AUC        | 0.7125             | 0.6667             | 0.6667                  |
| 4G AUC         | 0.8167             | 0.8333             | 0.8333                  |
| AUC diff       | -0.142             | -0.1667            | -0.1667                 |
| Conf. Interval | -0.18715, -0.02118 | -0.33000, -0.00334 | -0.33000, -0.00334      |
| p-value        | <b>0.0139</b>      | <b>0.0455</b>      | <b>0.0455</b>           |

**Receiver operating characteristic (ROC) Curves: WT1 (Blue) vs 5G MRD (Red)**

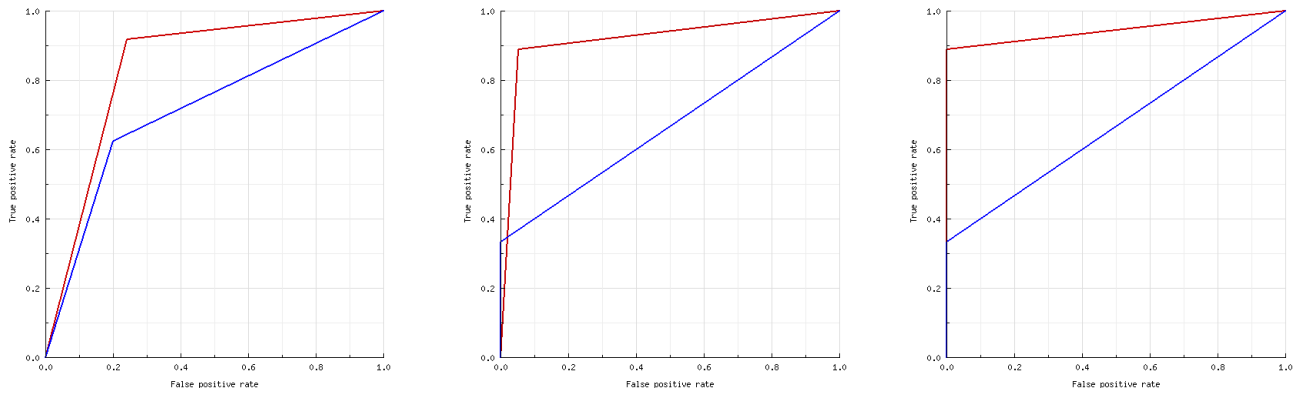

|                | 74 pts (all)       | 48 pts (all CR)    | 37 pts (CR exclude NRM) |
|----------------|--------------------|--------------------|-------------------------|
| WT1 AUC        | 0.7125             | 0.6667             | 0.6667                  |
| 5G AUC         | 0.8383             | 0.9188             | 0.9444                  |
| AUC diff       | -0.1258            | -0.2521            | -0.2778                 |
| Conf. Interval | -0.22268, -0.02899 | -0.42784, -0.07644 | -0.44994, -0.10561      |
| p-value        | <b>0.0109</b>      | <b>0.0049</b>      | <b>0.0016</b>           |

B)

**McNemar's Test** 37 patients (CR excluding NRM)

Sensitivity (relapse, n=9)

|             | 5G MRD+ | 5G MRD- |
|-------------|---------|---------|
| <b>WT1+</b> | 3       | 0       |
| <b>WT1-</b> | 5       | 1       |

Difference: -0.556, p: **0.031** (1 sided)

Specificity (no-relapse, n=28)

|             | 5G MRD+ | 5G MRD- |
|-------------|---------|---------|
| <b>WT1+</b> | 0       | 0       |
| <b>WT1-</b> | 0       | 28      |

Difference: 0, p: 0.5 (1 sided)

**Supplemental Figure 3: Sensitivity of Multigene MRD test is statistically superior to WT1 MRD alone. See over for complete legend.**

**Supplemental Figure 3:** Sensitivity of Multigene MRD test is statistically superior to WT1 MRD alone. A) Performance characteristics of both WT1 and MG-MRD displayed by receiver operating characteristic curves, demonstrating the statistically significant difference between the tests. B) WT1 is a constituent part of the MG-MRD assay, and by design a positive level of expression for any gene is considered a positive MG-MRD test (*ie: not possible for addition of extra gene assays to WT1 to decrease sensitivity*). A one-sided McNemar's test was therefore performed which determined the improvement in sensitivity to predict relapse in the MG-MRD test compared to WT1 alone was statistically significant (p: 0.031). Specificity was not different between the two tests.
